# Supplementary material
Source: PubMed Central journal article supplement (PMC4790501)
Supplement: casa003769.ww1_default.pdf [file casa003769.ww1_default.pdf]

Table A1. Distribution of births in the cohort by parity, whether the mother was treated before or after delivery and type of treatment received

| All births                           | LLETZ/Loop/Cone        |                         | Punch biopsy           |                         | Not Known <sup>1</sup> |                         |
|--------------------------------------|------------------------|-------------------------|------------------------|-------------------------|------------------------|-------------------------|
|                                      | Birth after colposcopy | Birth before colposcopy | Birth after colposcopy | Birth before colposcopy | Birth after colposcopy | Birth before colposcopy |
| <b>No previous births</b>            |                        |                         |                        |                         |                        |                         |
| All births                           | 2,088                  | 824                     | 3,284                  | 1,219                   | 833                    | 846                     |
| Preterm 20-36                        | 207                    | 68                      | 276                    | 84                      | 82                     | 82                      |
|                                      | <b>9.9%</b>            | <b>8.3%</b>             | <b>8.4%</b>            | <b>6.9%</b>             | <b>9.8%</b>            | <b>9.7%</b>             |
| Very preterm 20-32                   | 68                     | 24                      | 82                     | 23                      | 24                     | 16                      |
|                                      | <b>3.3%</b>            | <b>2.9%</b>             | <b>2.5%</b>            | <b>1.9%</b>             | <b>2.9%</b>            | <b>1.9%</b>             |
| <b>One or more previous births</b>   |                        |                         |                        |                         |                        |                         |
| All births                           | 2,688                  | 349                     | 3,979                  | 517                     | 1393                   | 421                     |
| Preterm 20-36                        | 242                    | 30                      | 310                    | 35                      | 167                    | 33                      |
|                                      | <b>9.0%</b>            | <b>8.6%</b>             | <b>7.8%</b>            | <b>6.8%</b>             | <b>12.0%</b>           | <b>7.8%</b>             |
| Very preterm 20-32                   | 75                     | 11                      | 82                     | 8                       | 52                     | 6                       |
|                                      | <b>2.8%</b>            | <b>3.2%</b>             | <b>2.1%</b>            | <b>1.5%</b>             | <b>3.7%</b>            | <b>1.4%</b>             |
| <b>Live (and still intra-partum)</b> |                        |                         |                        |                         |                        |                         |
|                                      | LLETZ/Loop/Cone        |                         | Punch biopsy           |                         | Not Known              |                         |
|                                      | Birth after colposcopy | Birth before colposcopy | Birth after colposcopy | Birth before colposcopy | Birth after colposcopy | Birth before colposcopy |
| <b>No previous births</b>            |                        |                         |                        |                         |                        |                         |
| All births                           | 2,072                  | 818                     | 3,271                  | 1,209                   | 828                    | 755                     |
| Preterm 20-36                        | 198                    | 65                      | 270                    | 78                      | 82                     | 71                      |
|                                      | <b>9.6%</b>            | <b>7.9%</b>             | <b>8.3%</b>            | <b>6.5%</b>             | <b>9.9%</b>            | <b>9.4%</b>             |
| Very preterm 20-32                   | 61                     | 21                      | 78                     | 21                      | 24                     | 14                      |
|                                      | <b>2.9%</b>            | <b>2.6%</b>             | <b>2.4%</b>            | <b>1.7%</b>             | <b>2.9%</b>            | <b>1.9%</b>             |

**One or more previous births**

|                    |             |             |             |             |              |             |
|--------------------|-------------|-------------|-------------|-------------|--------------|-------------|
| All births         | 2,675       | 347         | 3,969       | 513         | 1383         | 385         |
| Preterm 20-36      | 233         | 28          | 304         | 32          | 162          | 33          |
|                    | <b>8.7%</b> | <b>8.1%</b> | <b>7.7%</b> | <b>6.2%</b> | <b>11.7%</b> | <b>8.6%</b> |
| Very preterm 20-32 | 69          | 10          | 76          | 5           | 48           | 6           |
|                    | <b>2.6%</b> | <b>2.9%</b> | <b>1.9%</b> | <b>1.0%</b> | <b>3.5%</b>  | <b>1.6%</b> |

<sup>1</sup> Note that 72% of the not known after colposcopy were from one site which did not report the type of procedure (i.e. LLETZ or punch biopsy), by comparison just 29% of not known before colposcopy come from this hospital.

Table A2. Comparison of hospitals included in the study with hospitals in England with a colposcopy unit \*

|                                     | National Health Service Hospitals with a colposcopy clinic in England |                                         |                      |
|-------------------------------------|-----------------------------------------------------------------------|-----------------------------------------|----------------------|
|                                     | Proportion included<br>in the study                                   | National average<br>excluding our sites | Inter-quartile range |
| % referrals clinically indicated    | 17.5                                                                  | 16.2                                    | 8.2-22.9             |
| % DNA on colposcopy appointments    | 14.1                                                                  | 12.4                                    | 8.0-14.4             |
| % with procedure at first appt      | 65.1                                                                  | 63.4                                    | 56.2-77.6            |
| % excision at first appt            | 12.4                                                                  | 16.4                                    | 4.7-25.2             |
| % ablation (+/- biopsy) on 1st appt | 1.2                                                                   | 1.4                                     | 0.0-5.73             |
| % biopsy result within 8 weeks      | 82.5                                                                  | 88.0                                    | 86.1-99.5            |
| % biopsies with CIN                 | 82.0                                                                  | 86.0                                    | 79.7-91.5            |
| Total new referrals per year        | 10,938                                                                | 118,269                                 |                      |

\*Proportions are based on published national statistics for 2005/2006<sup>1</sup> chosen as a mid-point for the data included in the study

Table A3. Summary of analyses and results for very preterm births (&lt;33 weeks)

|                                             | Total<br>births | Crude<br>Rate<br>(preterm) | Relative risk(95% CI ) |
|---------------------------------------------|-----------------|----------------------------|------------------------|
| <b>England</b>                              | 510,660         | <b>1.7%</b>                | -                      |
| <b>External</b> (vs. England)               |                 |                            |                        |
| All cohort                                  | 18,441          | 2.6%                       | 1.48(1.35 to 1.63)     |
| All post histology                          | 14,265          | 2.7%                       | 1.56(1.41 to 1.72)     |
| Post treatment                              | 4776            | 3.0%                       | 1.74(1.48 to 2.05)     |
| <b>Internal*</b>                            |                 |                            |                        |
| All post histology vs.<br>all pre histology | 8779<br>3368    | <b>2.8%</b><br>2.0%        | 1.60(1.18 to 2.18)     |
| Post treatment                              | 2900            | <b>3.0%</b>                |                        |
| (i) vs. pre treatment                       | 988             | 2.4%                       | 1.45(0.91 to 2.31)     |
| (ii) vs. post biopsy                        | 4484            | 2.5%                       | 1.23(0.89 to 1.69)     |
| (iii) Adjusted                              | -               | -                          | 0.81(0.43 to 1.52)     |

\*For the Internal analysis the relative risk is adjusted by study site, parity and maternal age at delivery

Table A4. Risk of preterm delivery in second and subsequent births after colposcopy.

|                                               | Treated |           | Punch |           | Crude RR (95% CI)  | Adjusted* RR (95% CI) |
|-----------------------------------------------|---------|-----------|-------|-----------|--------------------|-----------------------|
|                                               | N       | % Preterm | N     | % Preterm |                    |                       |
| Last birth before colposcopy                  | 1038    | 8.1       | 1501  | 6.5       | 1.24(0.94 to 1.64) | 1.50(1.08 to 2.09)    |
| First birth after colposcopy                  | 3453    | 9.1       | 5252  | 8.3       | 1.10(0.95 to 1.26) | 1.16(0.99 to 1.36)    |
| Second and subsequent births after colposcopy | 1241    | 8.8       | 1915  | 6.7       | 1.31(1.03 to 1.68) | 1.54(1.16 to 2.05)    |

\*Relative risk adjusted by parity, maternal age and study site

Table A5. Within woman comparison: women who had a birth both pre and post colposcopy

|                         | Total women | Preterm after colposcopy (%) | Preterm before colposcopy (%) | Number with discordant outcome | RR   |           |
|-------------------------|-------------|------------------------------|-------------------------------|--------------------------------|------|-----------|
|                         |             |                              |                               |                                | RR   | 95% CI    |
| All                     | 1078        | 9.1%                         | 7.4%                          | 136                            | 1.23 | 0.95-1.56 |
| Treated                 | 372         | 8.1%                         | 8.6%                          | 44                             | 0.94 | 0.62-1.43 |
| Not Treated             | 501         | 8.4%                         | 7.4%                          | 59                             | 1.14 | 0.77-1.66 |
| Treated vs. not treated | 873         | -                            | -                             | 103                            | 0.82 | 0.27-3.17 |
